# Supplementary material for: Gender-Specificity of Fatigue and Concerns Related to the COVID-19 Pandemic—A Report on the Polish Population
Source: MDPI journal article supplement (doi:10.3390/ijerph20075407), 2023-04-05
Supplement: s1 [file s1]

## SUPPLEMENTARY

Table S1 Sociodemographic part

|                                                                                            |                                                   |
|--------------------------------------------------------------------------------------------|---------------------------------------------------|
| Gender                                                                                     |                                                   |
| Please indicate your gender                                                                | woman                                             |
|                                                                                            | man                                               |
| Age                                                                                        |                                                   |
| Please indicate your age                                                                   | <18 years (exclusion from the study)              |
|                                                                                            | 18-29 years                                       |
|                                                                                            | 30-39 years                                       |
|                                                                                            | 40-49 years                                       |
|                                                                                            | 50-59 years                                       |
|                                                                                            | ≥60 years                                         |
| Accommodation                                                                              |                                                   |
| Please indicate What is your place of residence                                            | countryside                                       |
|                                                                                            | town ≤ 200 000                                    |
|                                                                                            | town 200 000 -500 000                             |
|                                                                                            | town ≥ 500                                        |
| Education                                                                                  |                                                   |
| Please indicate what education level do you have                                           | elementary or junior high school                  |
|                                                                                            | basic vocational                                  |
|                                                                                            | secondary or post-secondary                       |
|                                                                                            | higher education                                  |
| Employment                                                                                 |                                                   |
| Please indicate what is your status in the labor market (one answer):                      | employed (full-time or self-employed)             |
|                                                                                            | student                                           |
|                                                                                            | unemployed                                        |
|                                                                                            | pensioner/Retiree                                 |
|                                                                                            | household leader                                  |
| Chronic diseases                                                                           |                                                   |
| Are you currently being treated for a chronic disease (e.g., diabetes hypertension, COPD)? | No                                                |
|                                                                                            | Yes, 1                                            |
|                                                                                            | Yes, more than 1                                  |
| COVID-19 vaccination                                                                       |                                                   |
| Are you vaccinated against COVID-19?                                                       | No                                                |
|                                                                                            | Yes, not fully (first dose)                       |
|                                                                                            | Yes, fully (two doses or single-dose formulation) |
| Pass the COVID-19                                                                          |                                                   |
| Have you undergone COVID-19 infection?                                                     | Yes                                               |
|                                                                                            | No                                                |
|                                                                                            | I do not know                                     |

Table S2 Pandemic Fatigue Scale (PFS): Please indicate to which extent you disagree or agree with the following statements:

| PFS                                                                                                                            | 1                 | 2        | 3                 | 4          | 5              | 6       | 7                |
|--------------------------------------------------------------------------------------------------------------------------------|-------------------|----------|-------------------|------------|----------------|---------|------------------|
|                                                                                                                                | Strongly disagree | Disagree | I rather disagree | No opinion | I rather agree | I agree | I strongly agree |
| I am tired of all the COVID-19 discussions in TV shows, newspapers, and radio programs, etc                                    |                   |          |                   |            |                |         |                  |
| I am sick of hearing about COVID-19                                                                                            |                   |          |                   |            |                |         |                  |
| When friends or family members talk about COVID-19, I try to change the subject because I do not want to talk about it anymore |                   |          |                   |            |                |         |                  |
| I feel strained from following all of the behavioural regulations and recommendations around COVID-19                          |                   |          |                   |            |                |         |                  |
| I am tired of restraining myself to save those who are most vulnerable to COVID-19                                             |                   |          |                   |            |                |         |                  |
| I am losing my spirit to fight against COVID-19                                                                                |                   |          |                   |            |                |         |                  |

Table S3 Subjective Fatigue Symptoms (SFS-6): Please indicate how much are you currently experiencing the following aspects of pandemic fatigue: not at all, to a small extent, moderately, fairly intensively or very intensively

|                                                                                                                                                                               | 1          | 2                 | 3          | 4                  | 5                |
|-------------------------------------------------------------------------------------------------------------------------------------------------------------------------------|------------|-------------------|------------|--------------------|------------------|
|                                                                                                                                                                               | Not at all | To a small extent | Moderately | Fairly intensively | Very intensively |
| Difficulty in focusing attention and organizing one's own mental activity                                                                                                     |            |                   |            |                    |                  |
| Emotional tension and/or mental discomfort                                                                                                                                    |            |                   |            |                    |                  |
| Feeling overwhelmed by the need to stay connected online with people while feeling a lack of real social contact                                                              |            |                   |            |                    |                  |
| A perception of over-stimulation associated with the use of technology for online contact (e.g., multiple applications, frequency of online meetings, use of a camera, etc.). |            |                   |            |                    |                  |
| A sense of lack of energy and/or reduced ability to perform daily tasks                                                                                                       |            |                   |            |                    |                  |
| Sleep problems (drowsiness despite adequate sleep intake or insomnia, disruption of sleep rhythm)                                                                             |            |                   |            |                    |                  |

Table S4 Covid-19 Concerns Checklist (CCC): “How much are you currently afraid of the following situations: not at all, a minor level, moderately, a high level or a very high level”

|                                                                | 1          | 2           | 3          | 4          | 5               |
|----------------------------------------------------------------|------------|-------------|------------|------------|-----------------|
|                                                                | Not at all | minor level | moderately | high level | very high level |
| I can be a source of infection for my loved ones               |            |             |            |            |                 |
| Losing someone you love                                        |            |             |            |            |                 |
| Health system overload                                         |            |             |            |            |                 |
| Diseases (other than COVID-19) in the pandemic situation       |            |             |            |            |                 |
| Unemployment growth                                            |            |             |            |            |                 |
| Price growth                                                   |            |             |            |            |                 |
| Financial difficulties due to loss of income                   |            |             |            |            |                 |
| Economic crisis                                                |            |             |            |            |                 |
| Re-lockdown                                                    |            |             |            |            |                 |
| Unpredictability and uncertainty of the course of the pandemic |            |             |            |            |                 |

Table S5 Differences between respondents age categories in pandemic fatigue (PFS, PFS info, PFS behav), subjective fatigue symptoms (SFS) and CCC

|           | 18-29       | 30-39       | 40-49       | 50-59       | ≥60         | F      | p     |
|-----------|-------------|-------------|-------------|-------------|-------------|--------|-------|
|           | M (SD)      |        |       |
| PFS       | 5.02 (1.44) | 5.13 (1.53) | 4.68 (1.66) | 4.35 (1.72) | 3.77 (1.64) | 33.114 | <.001 |
| PFS info  | 5.14 (1.41) | 5.34 (1.44) | 4.78 (1.61) | 4.55 (1.62) | 3.74 (1.49) | 28.184 | <.001 |
| PFS behav | 4.68 (1.43) | 4.75 (1.58) | 4.37 (1.63) | 4.08 (1.66) | 3.46 (1.56) | 29.572 | <.001 |
| SFS       | 2.77 (1.08) | 2.77 (1.12) | 2.58 (1.03) | 2.38 (1.03) | 2.23 (0.95) | 13.526 | <.001 |
| CCC       | 3.34 (.64)  | 3.41 (.82)  | 3.41 (.73)  | 3.35 (.84)  | 3.37 (.69)  | .378   | .825  |

Table S6 Differences between respondents according to treatment for chronic diseases in pandemic fatigue (PFS, PFS info, PFS Behav), subjective fatigue symptoms (SFS) and Covid-19 Concerns Checklist (CCC)

|           | No          | Yes, 1      | Yes >1      | F      | p     |
|-----------|-------------|-------------|-------------|--------|-------|
|           | M (SD)      | M (SD)      | M (SD)      |        |       |
| PFS       | 4.67 (1.68) | 4.39 (1.66) | 3.94 (1.69) | 11.131 | <.001 |
| PFS info  | 4.87 (1.63) | 4.56 (1.56) | 4.06 (1.69) | 14.201 | <.001 |
| PFS behav | 4.30 (1.65) | 4.11 (1.64) | 3.74 (1.62) | 6.263  | .002  |
| SFS       | 2.48 (.94)  | 2.57 (.95)  | 2.60 (1.03) | 1.243  | .289  |
| CCC       | 3.32 (.74)  | 3.47 (.72)  | 3.38 (.73)  | 4.717  | .009  |

Table S7 Differences between respondents according to COVID-19 vaccination in pandemic fatigue (PFS, PFS info, PFS Behav), subjective fatigue symptoms (SFS) and Covid-19 Concerns Checklist (CCC)

|           | No          | Yes, 1st dose | Yes, full   | F      | p     |
|-----------|-------------|---------------|-------------|--------|-------|
|           | M (SD)      | M (SD)        | M (SD)      |        |       |
| PFS       | 5.29 (1.52) | 4.67 (1.34)   | 4.11 (1.66) | 66.859 | <.001 |
| PFS info  | 5.47 (1.41) | 4.61 (1.31)   | 4.31 (1.63) | 60.555 | <.001 |
| PFS behav | 4.91 (1.57) | 4.55 (1.46)   | 3.80 (1.58) | 56.890 | <.001 |
| SFS       | 2.57 (1.15) | 2.94 (0.89)   | 2.45 (1.01) | 7.343  | <.001 |
| CCC       | 3.26 (.82)  | 3.38 (.80)    | 3.44 (.68)  | 6.127  | .002  |

Table S8 Differences between respondents according to pass the COVID-19 in pandemic fatigue (PFS, PFS info, PFS Behav), subjective fatigue symptoms (SFS) and Covid-19 Concerns Checklist (CCC)

|           | No          | I do not know | Yes         | F      | p     |
|-----------|-------------|---------------|-------------|--------|-------|
|           | M (SD)      | M (SD)        | M (SD)      |        |       |
| PFS       | 4.35 (1.58) | 4.78 (1.36)   | 4.39 (1.53) | 5.709  | .003  |
| PFS info  | 4.62 (1.67) | 5.07 (1.40)   | 4.54 (1.66) | 6.512  | .002  |
| PFS behav | 4.08 (1.68) | 4.48 (1.56)   | 4.23 (1.61) | 4.446  | .012  |
| SFS       | 2.41 (1.08) | 2.68 (0.99)   | 2.73 (0.98) | 10.171 | <.001 |
| CCC       | 3.34 (0.74) | 3.45 (0.69)   | 3.45 (0.75) | 2.345  | .096  |
